# Supplementary material for: The incidence of training responsiveness to cardiorespiratory fitness and cardiometabolic measurements following individualized and standardized exercise prescription: study protocol for a randomized controlled trial
Source: PubMed Central journal article supplement (PMC5168814; doi:10.1186/s13063-016-1735-0), 2016-12-19
Supplement: 13063_2016_1735_MOESM2_ESM.pdf [file 13063_2016_1735_MOESM2_ESM.pdf]

**Table 1** SPIRIT study calendar for the experimental group for the first 12 week intervention

| Point of time:           | Pre-intervention | Baseline | Exercise Intervention |        |        |         | 12 Week Analysis |
|--------------------------|------------------|----------|-----------------------|--------|--------|---------|------------------|
|                          |                  |          | Time 0                | Week 4 | Week 8 | Week 12 |                  |
| <b>Enrollment</b>        |                  |          |                       |        |        |         |                  |
| Recruitment              | X                |          |                       |        |        |         |                  |
| Medical history          | X                |          |                       |        |        |         |                  |
| Inclusion criteria       | X                |          |                       |        |        |         |                  |
| Randomization            |                  |          | X                     |        |        |         |                  |
| <b>Testing</b>           |                  |          |                       |        |        |         |                  |
| Height                   |                  | X        |                       | X      | X      | X       |                  |
| Weight                   |                  | X        |                       | X      | X      | X       |                  |
| Resting heart rate       |                  | X        |                       | X      | X      | X       |                  |
| Resting blood pressure   |                  | X        |                       | X      | X      | X       |                  |
| Waist circumference      |                  | X        |                       | X      | X      | X       |                  |
| Low-density lipoprotein  |                  | X        |                       | X      | X      | X       |                  |
| High-density lipoprotein |                  | X        |                       | X      | X      | X       |                  |
| Triglycerides            |                  | X        |                       | X      | X      | X       |                  |
| Blood glucose            |                  | X        |                       | X      | X      | X       |                  |
| Maximal exercise test    |                  | X        |                       | X      | X      | X       |                  |
| Verification test        |                  | X        |                       | X      | X      | X       |                  |
| 3-day nutrition recall   |                  | X        |                       |        |        |         | X                |
| <b>Analysis</b>          |                  |          |                       |        |        |         |                  |
| Biological variability   |                  |          | X                     |        |        |         |                  |
| Time course changes      |                  |          |                       |        |        |         | X                |
| Incidence of response    |                  |          |                       |        |        |         | X                |

**Table 2** SPIRIT study calendar for the control group for the first 12 week intervention

| Point of time:           | Pre-intervention | Baseline | Time 0 | Week 4 | Week 8 | Week 12 | 12 Week Analysis |
|--------------------------|------------------|----------|--------|--------|--------|---------|------------------|
|                          |                  |          |        |        |        |         |                  |
| Recruitment              | X                |          |        |        |        |         |                  |
| Medical history          | X                |          |        |        |        |         |                  |
| Inclusion criteria       | X                |          |        |        |        |         |                  |
| <b>Testing</b>           |                  |          |        |        |        |         |                  |
| Height                   |                  | X        |        | X      | X      | X       |                  |
| Weight                   |                  | X        |        | X      | X      | X       |                  |
| Resting heart rate       |                  | X        |        | X      | X      | X       |                  |
| Resting blood pressure   |                  | X        |        | X      | X      | X       |                  |
| Waist circumference      |                  | X        |        | X      | X      | X       |                  |
| Low-density lipoprotein  |                  | X        |        | X      | X      | X       |                  |
| High-density lipoprotein |                  | X        |        | X      | X      | X       |                  |
| Triglycerides            |                  | X        |        | X      | X      | X       |                  |
| Blood glucose            |                  | X        |        | X      | X      | X       |                  |
| Maximal exercise test    |                  | X        |        | X      | X      | X       |                  |
| Verification test        |                  | X        |        | X      | X      | X       |                  |
| 3-day dietary recall     |                  | X        |        |        |        |         | X                |
| IPAQ                     |                  | X        |        | X      | X      | X       |                  |
| <b>Analysis</b>          |                  |          |        |        |        |         |                  |
| 12 week changes          |                  |          |        |        |        |         | X                |

**Table 3** SPIRIT study calendar (second 12 weeks) for VO<sub>2</sub>max non-responders after the first 12 week intervention

| Point of time:               | Pre-intervention | Baseline | Exercise Intervention |        |        |         | 12 Week Analysis |
|------------------------------|------------------|----------|-----------------------|--------|--------|---------|------------------|
|                              |                  |          | Time 0                | Week 4 | Week 8 | Week 12 |                  |
| <b>Pre-Intervention</b>      |                  |          |                       |        |        |         |                  |
| Switch of experimental group | X                |          |                       |        |        |         |                  |
| <b>Testing</b>               |                  |          |                       |        |        |         |                  |
| Height                       |                  | X        |                       | X      | X      | X       |                  |
| Weight                       |                  | X        |                       | X      | X      | X       |                  |
| Resting heart rate           |                  | X        |                       | X      | X      | X       |                  |
| Resting blood pressure       |                  | X        |                       | X      | X      | X       |                  |
| Waist circumference          |                  | X        |                       | X      | X      | X       |                  |
| Low-density lipoprotein      |                  | X        |                       |        |        |         |                  |
| High-density lipoprotein     |                  | X        |                       |        |        |         |                  |
| Triglycerides                |                  | X        |                       |        |        |         |                  |
| Blood glucose                |                  | X        |                       |        |        |         |                  |
| Maximal exercise test        |                  | X        |                       | X      | X      | X       |                  |
| Verification test            |                  | X        |                       | X      | X      | X       |                  |
| 3-day nutrition recall       |                  | X        |                       |        |        |         | X                |
| <b>Analysis</b>              |                  |          |                       |        |        |         |                  |
| Incidence of response        |                  |          |                       |        |        |         | X                |
